# Supplementary material
Source: PubMed Central journal article supplement (PMC4548461)
Supplement: supp_jiv138_jiv138supp.pdf [file supp_jiv138_jiv138supp.pdf]

## Supplemental Figure Legends

Figure S1. Pre-vaccine HI and MN titers in pregnant women, stratified by self-reported influenza vaccination history. A) pH1N1, B) H3N2/Victoria, C) B/Wisconsin. Groups were compared using a Mann-Whitney U test, \*  $p < 0.05$ .

Figure S2. Graphical display of ANCOVA model used to analyze A) HI and B) MN data. ANCOVA was used to determine the relative contributions of baseline titer and pregnancy status on titer fold-change following IIV. Data is shown on a log<sub>2</sub> scale, and 95% confidence intervals were determined by bootstrapping. P-values represent a test of the effect of pregnancy on GMR while controlling for baseline GMT, n.s. = not significant.

Figure S3. HI and MN titers correlate in pregnant and control women. HI and MN fold changes (post-vaccination titer/pre-vaccination titer) for A) A/H1N1/California/2009 (pH1N1), B) A/H3N2/Victoria/2011 and C) B/Wisconsin were compared using Spearman correlation testing in control (blue) and pregnant (red) women.

Figure S4. Total serum IgG by week of pregnancy. Correlation analysis revealed a trend towards lower IgG concentrations as pregnancy progresses in pre-vaccine samples. However, this effect was absent in the post-vaccination samples. P-values represent a t-test for a non-zero slope, and r is the Pearson correlation coefficient.

Figure S5. Gating strategy to define B cell and plasmablast populations using mass cytometry.

Figure S6. Plasmablast and HI correlations. Spearman correlations in control (blue) and pregnant (red) women comparing plasmablast fold change and average HI fold change for pH1N1, H3N2 and Influenza B were not significantly different.

A

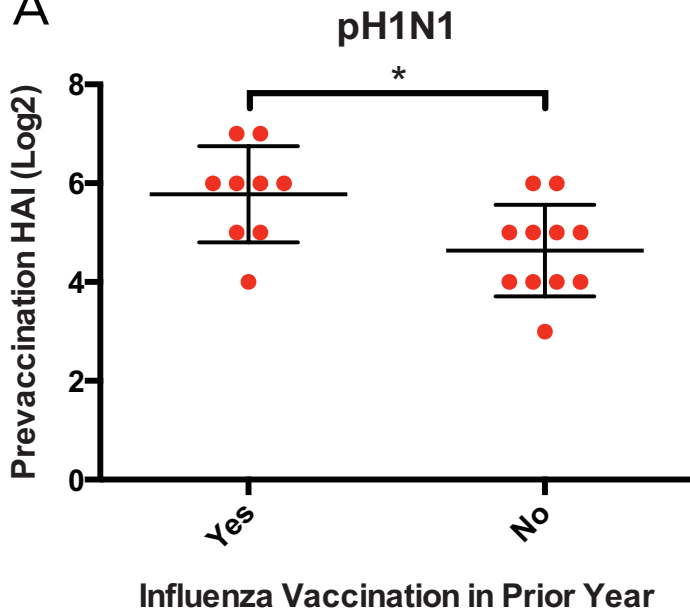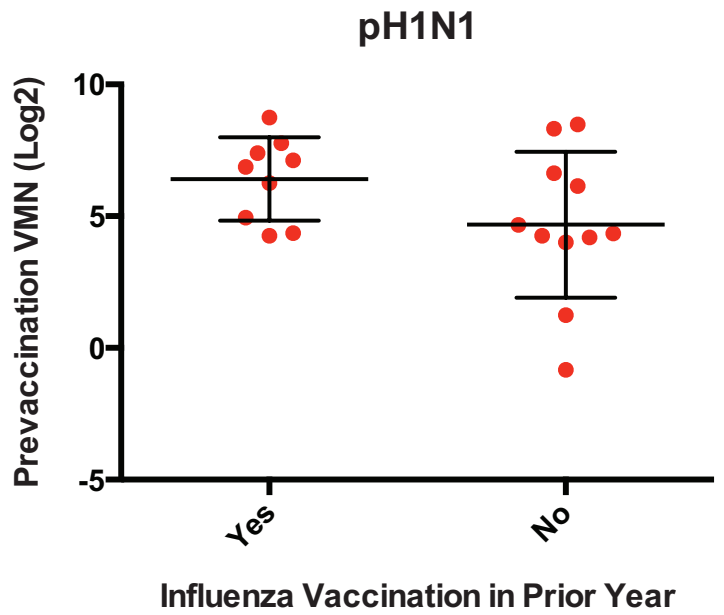

B

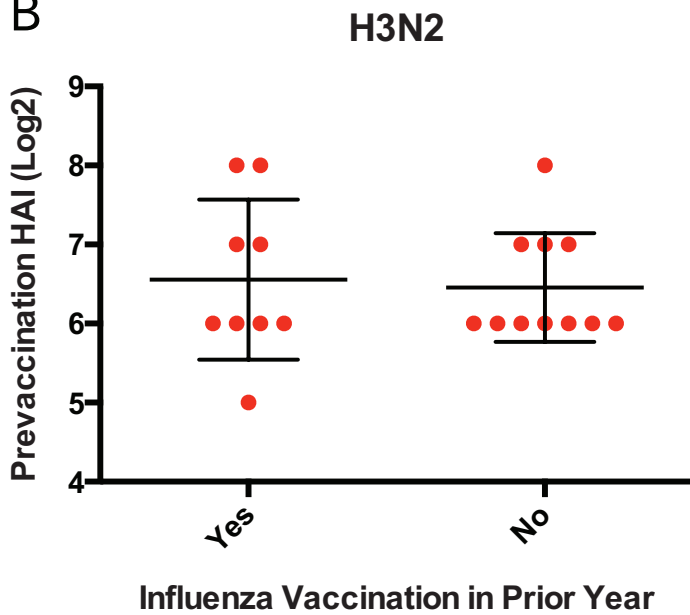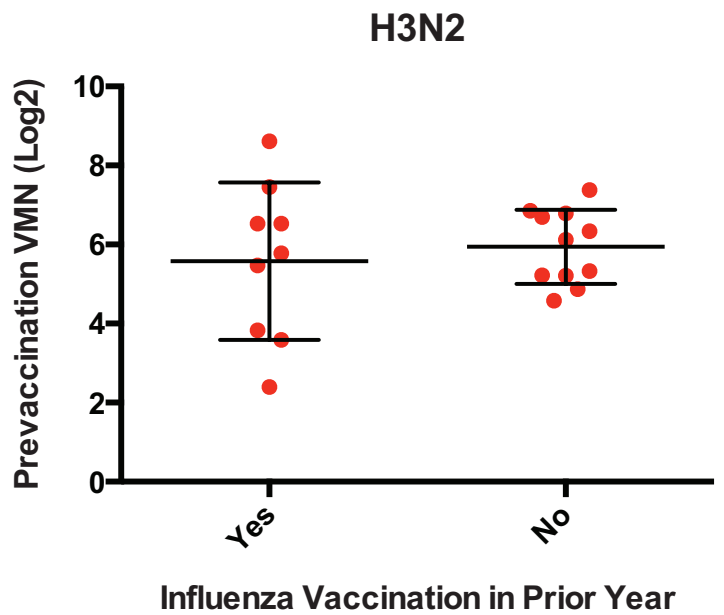

C

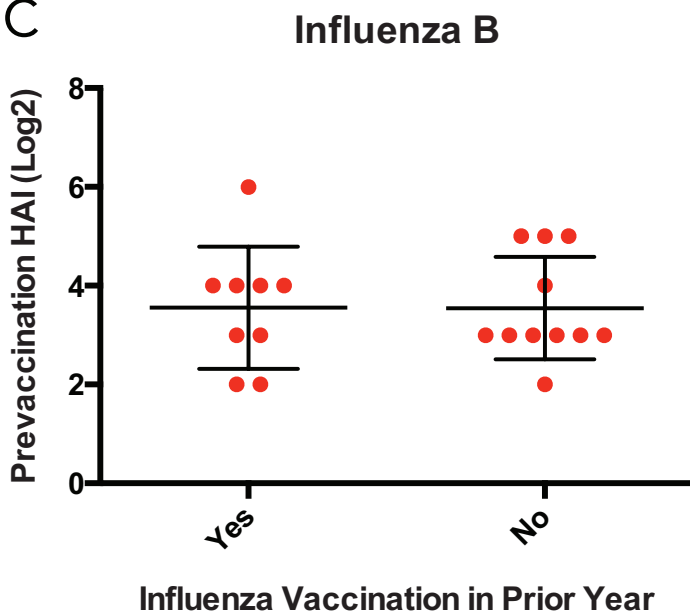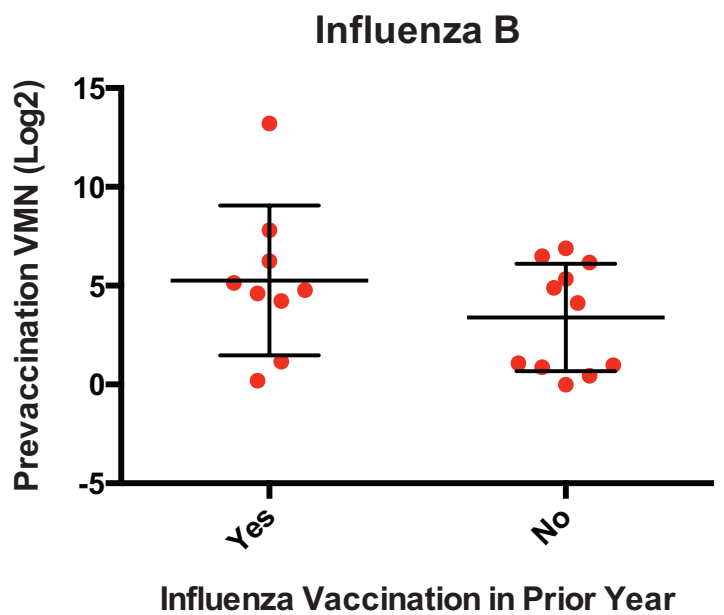

A

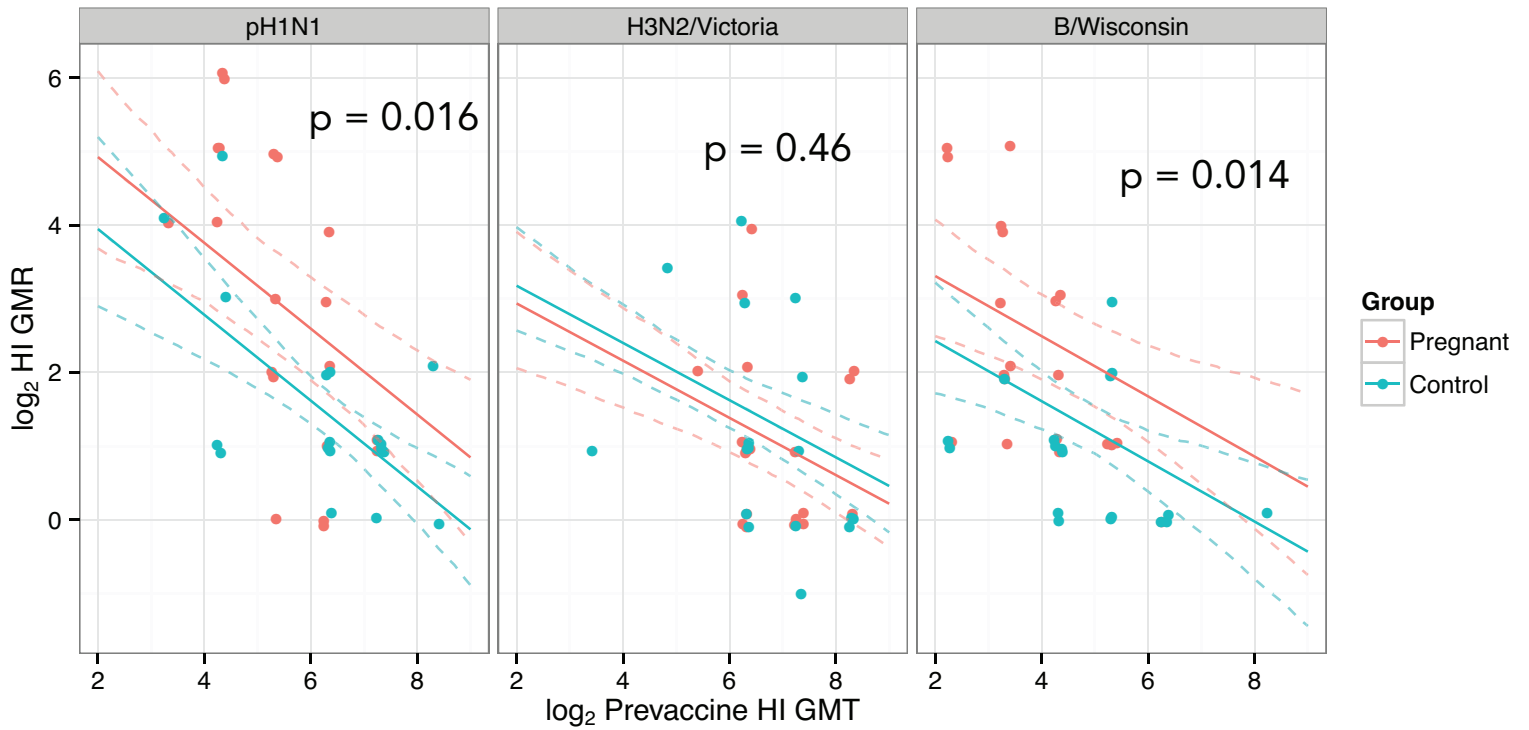

B

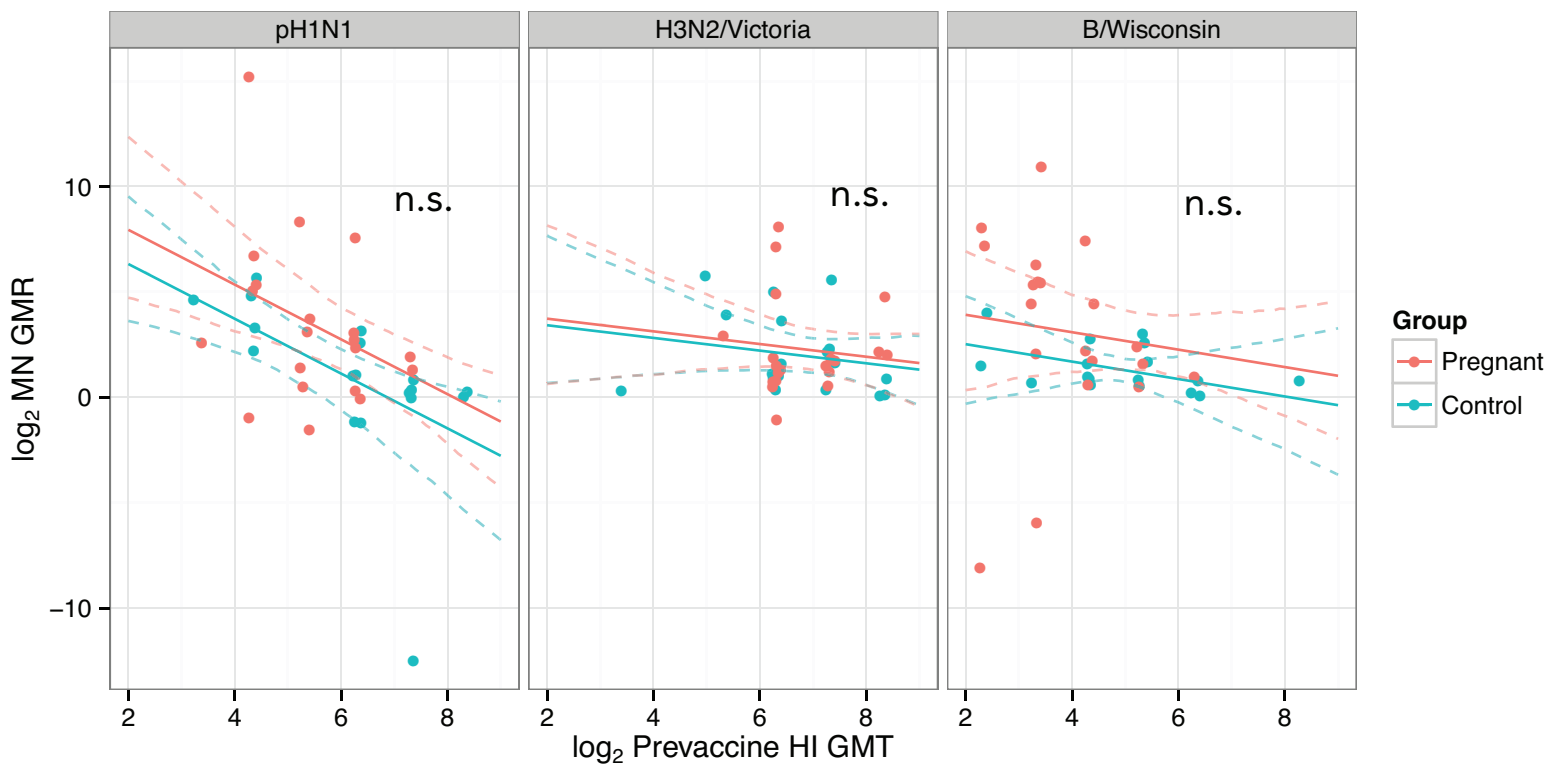

**A****Control**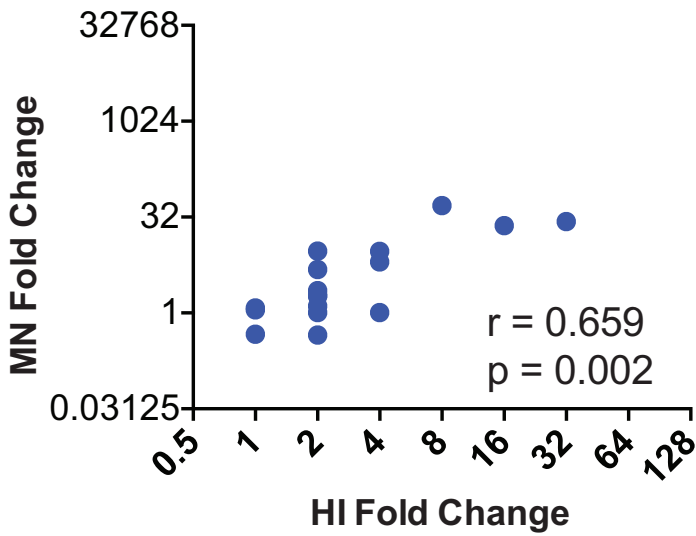**Pregnant**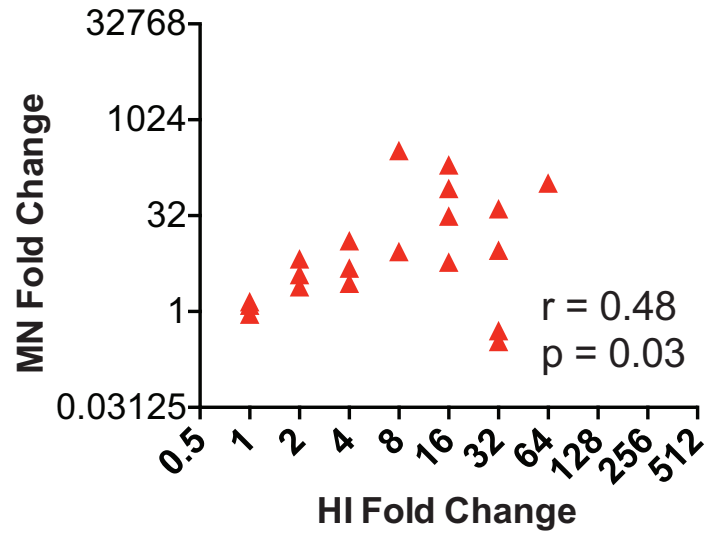**B**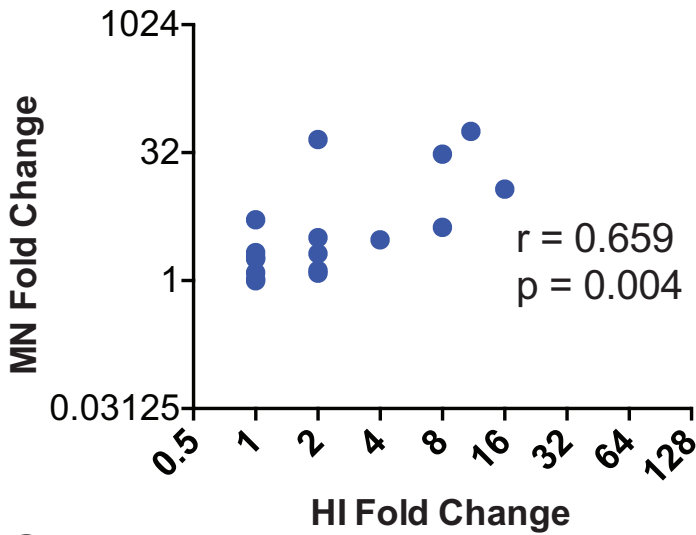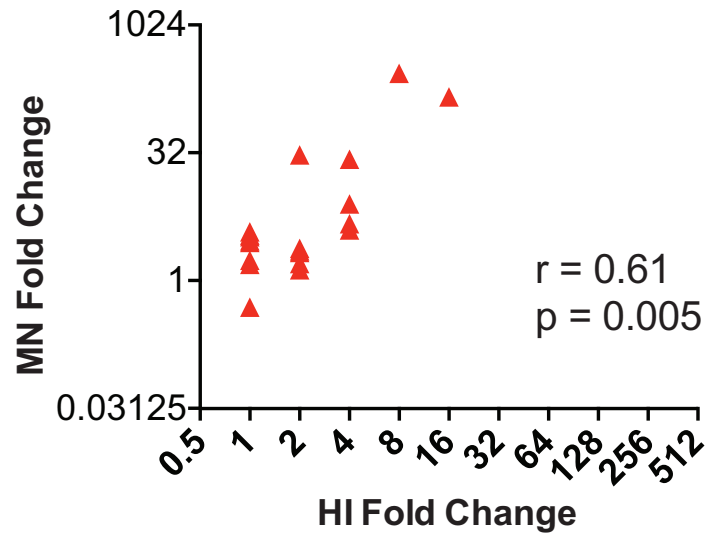**C**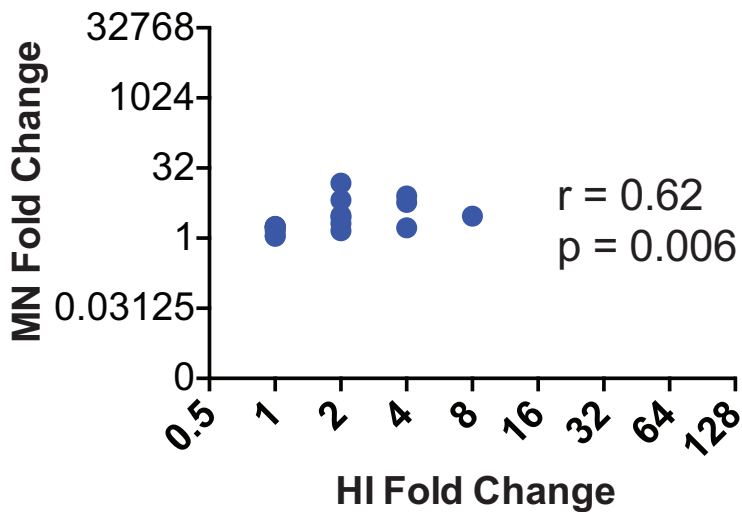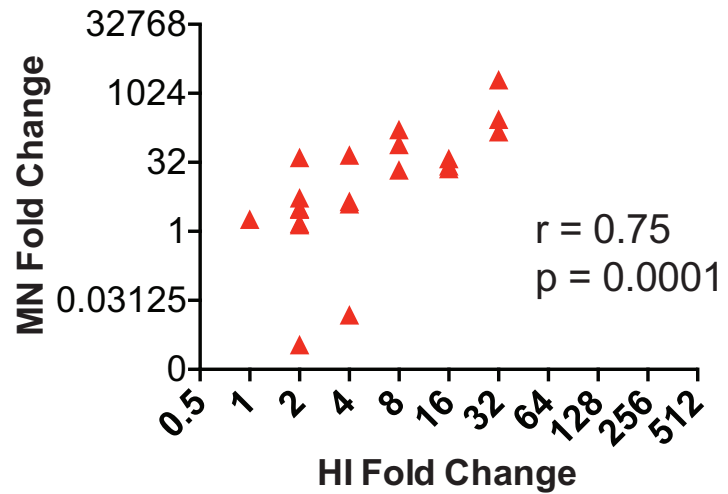

### Pre-Vaccine

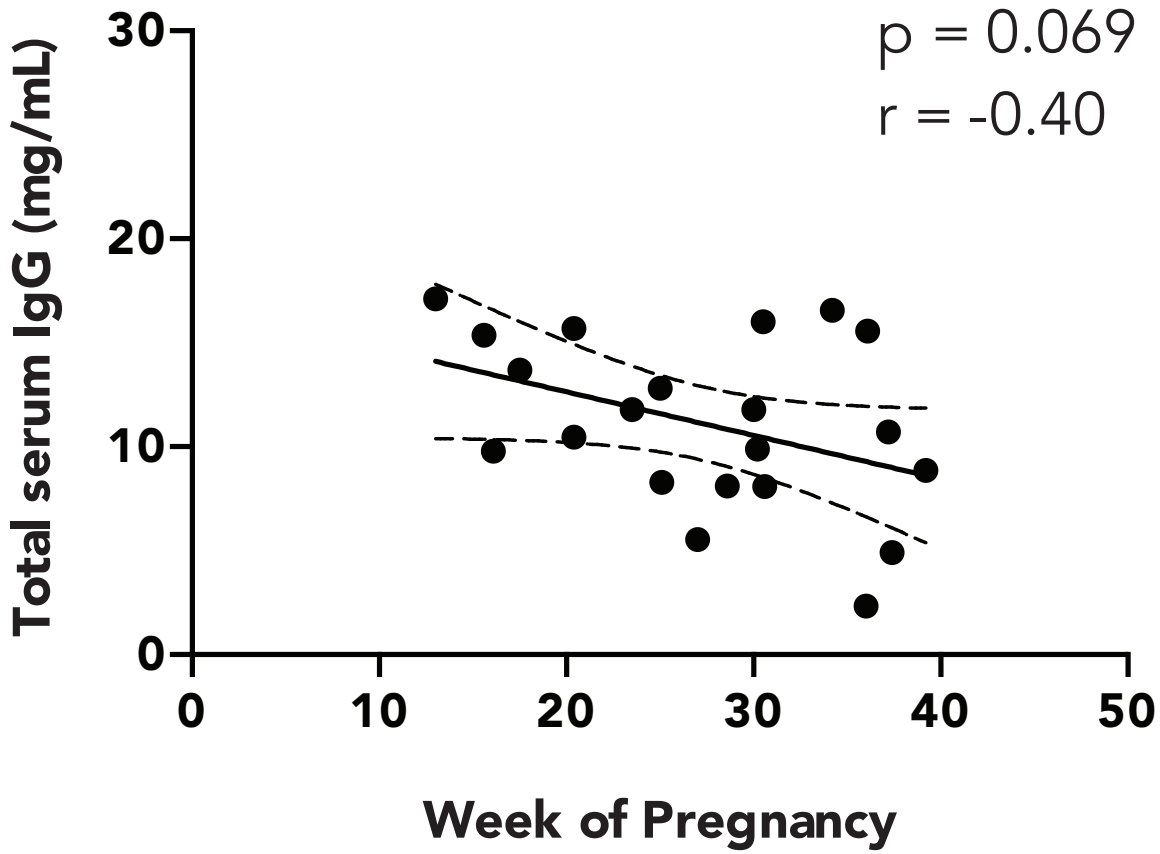

### Post-Vaccine

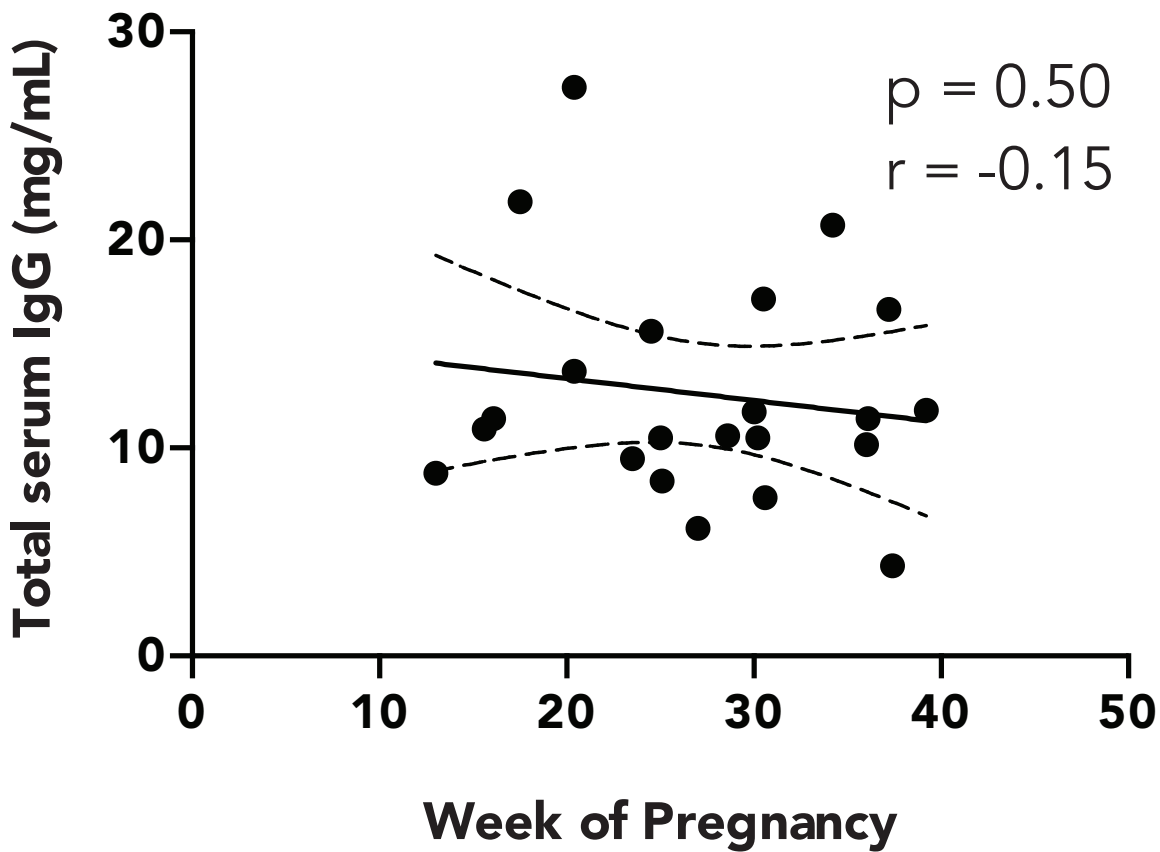

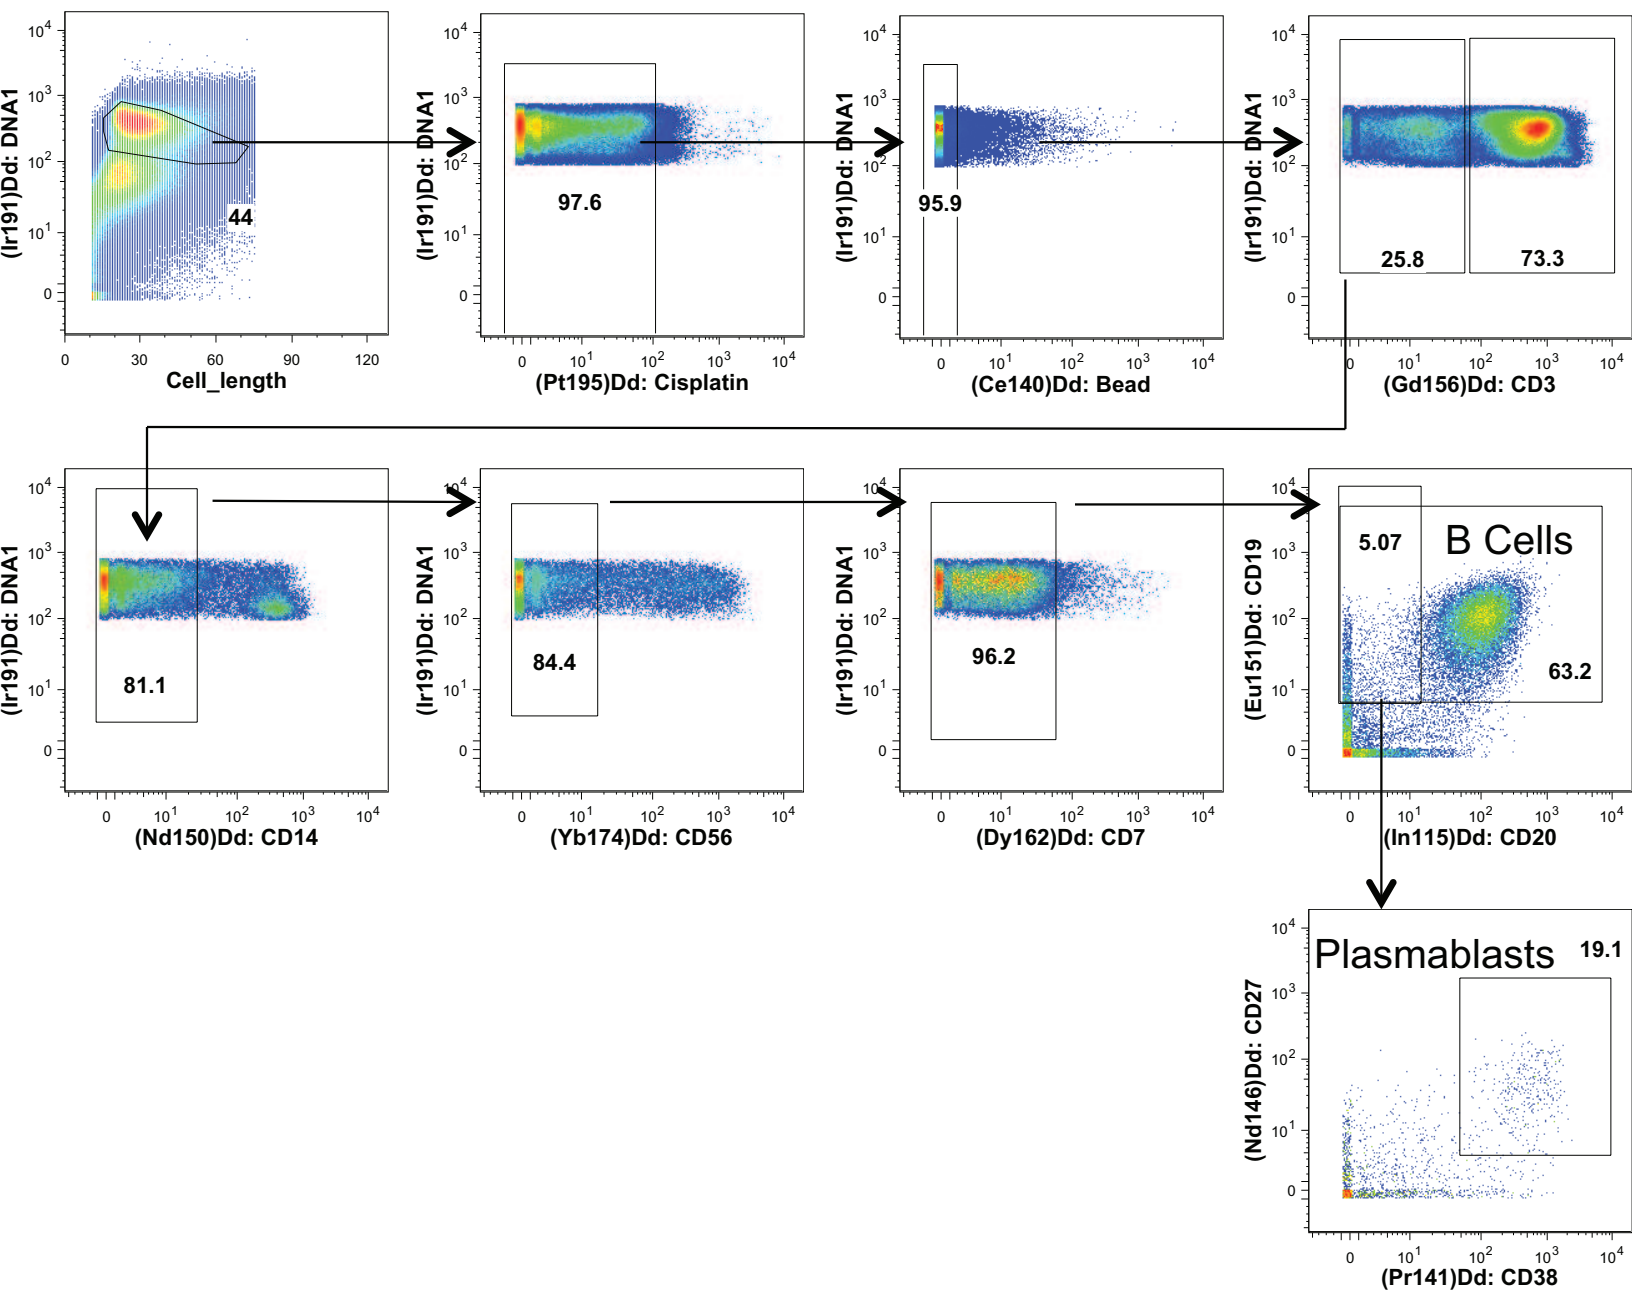

## Control

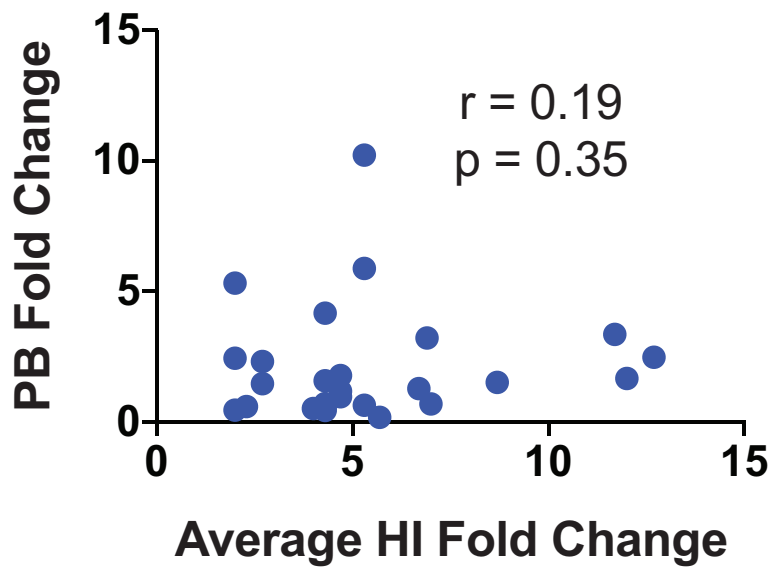

## Pregnant

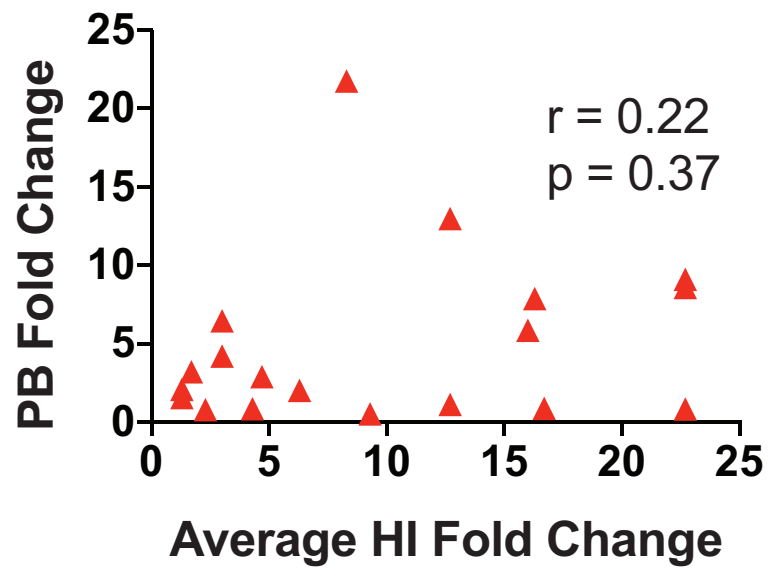

**Table S1. Mass Cytometry antibody and isotope information for plasmablast identification**

| Isotope | Isotope Source | Antibody | Antibody Clone | Antibody Source |
|---------|----------------|----------|----------------|-----------------|
| 115 Ln  | DVS Sciences   | CD20     | 2H7            | Biolegend       |
| 141 Pr  | DVS Sciences   | CD38     | HIT2           | Biolegend       |
| 146 Nd  | DVS Sciences   | CD27     | O323           | Biolegend       |
| 150 Nd  | DVS Sciences   | CD14     | M5E2           | Biolegend       |
| 151 Eu  | DVS Sciences   | CD19     | HIB19          | Biolegend       |
| 156 Gd  | DVS Sciences   | CD3      | UCHT1          | Biolegend       |
| 162 Dy  | DVS Sciences   | CD7      | 6B7            | Biolegend       |
| 174 Yb  | DVS Sciences   | CD56     | NCAM16.2       | BD Biosciences  |
